# Supplementary material for: Insulin resistance, combined with health-related lifestyles, psychological traits and adverse cardiometabolic profiles, is associated with cardiovascular diseases: findings from the BHMC study
Source: Royal Society of Chemistry journal article supplement (doi:10.1039/d4fo00941j), 2024-01-01
Supplement: d4fo00941j1.pdf [file d4fo00941j1.pdf]

## Supplementary materials

**Table S1.** Factors associated with CHD in men in the baseline survey of the Beijing Health Management Cohort.

|                                     | OR    | 95% CI of OR |       | <i>p</i> |
|-------------------------------------|-------|--------------|-------|----------|
| <b>Age</b>                          | 1.053 | 1.048        | 1.058 | <0.001   |
| <b>BRI groups</b>                   |       |              |       |          |
| Q1                                  | Ref   | NA           | NA    | NA       |
| Q2                                  | 0.986 | 0.834        | 1.166 | 0.870    |
| Q3                                  | 0.913 | 0.773        | 1.080 | 0.288    |
| Q4                                  | 0.846 | 0.714        | 1.004 | 0.055    |
| <b>Smoke status (n, %)</b>          |       |              |       |          |
| Never smoke                         | Ref   | NA           | NA    | NA       |
| Quit smoke                          | 1.607 | 1.373        | 1.882 | <0.001   |
| Current smoke                       | 0.949 | 0.843        | 1.067 | 0.380    |
| <b>Alcohol drink (n, %)</b>         |       |              |       |          |
| Never                               | Ref   | NA           | NA    | NA       |
| Ever                                | 1.031 | 0.896        | 1.187 | 0.665    |
| <b>Night sleep duration</b>         |       |              |       |          |
| < 5 h                               | 1.320 | 1.055        | 1.651 | 0.015    |
| 5-7 h                               | 1.227 | 1.090        | 1.381 | 0.001    |
| > 7 h                               | Ref   | NA           | NA    | NA       |
| <b>Times of sleep late per week</b> |       |              |       |          |
| Often                               | 1.234 | 1.075        | 1.417 | 0.003    |
| Seldom                              | 1.139 | 1.000        | 1.299 | 0.051    |
| Never                               | Ref   | NA           | NA    | NA       |
| <b>Dietary preference</b>           |       |              |       |          |
| Salty food                          | 1.104 | 0.985        | 1.238 | 0.090    |
| Sweet food                          | 0.971 | 0.831        | 1.136 | 0.717    |
| Red meat                            | 1.230 | 1.089        | 1.389 | 0.001    |
| Pickled food                        | 1.056 | 0.854        | 1.305 | 0.616    |
| <b>Dietary pattern</b>              |       |              |       |          |
| No special                          | Ref   | NA           | NA    | NA       |
| Vegan                               | 1.146 | 0.538        | 2.438 | 0.724    |
| Meatarian                           | 1.009 | 0.849        | 1.198 | 0.922    |
| Prefer vegetarian food              | 1.122 | 0.903        | 1.395 | 0.299    |
| <b>Eating speed</b>                 |       |              |       |          |
| Very fast                           | 1.551 | 1.263        | 1.903 | <0.001   |
| A little bit fast                   | 1.296 | 1.159        | 1.450 | <0.001   |
| Normal speed                        | Ref   | NA           | NA    | NA       |
| Slow                                | 0.767 | 0.630        | 0.934 | 0.008    |
| <b>Psychological character</b>      |       |              |       |          |
| Positive and optimistic             | 0.496 | 0.399        | 0.616 | <0.001   |
| Emotional                           | 1.040 | 0.819        | 1.320 | 0.747    |

|                       |       |       |       |        |
|-----------------------|-------|-------|-------|--------|
| Passive and depressed | Ref   | NA    | NA    | NA     |
| Dispassionate         | 0.775 | 0.623 | 0.963 | 0.021  |
| <b>Hypertension</b>   | 2.131 | 1.918 | 2.367 | <0.001 |
| <b>Hyperuricemia</b>  | 1.022 | 0.923 | 1.131 | 0.678  |
| <b>TyG</b>            |       |       |       |        |
| Q1                    | Ref   | NA    | NA    | NA     |
| Q2                    | 1.483 | 1.233 | 1.782 | <0.001 |
| Q3                    | 2.118 | 1.769 | 2.535 | <0.001 |
| Q4                    | 3.334 | 2.777 | 4.002 | <0.001 |

---

BRI: body roundness index; TyG index: triglyceride-glucose index; HDL: high-density lipoprotein. OR: odds ratio; CI: confidence interval. Q1 to Q4 represented the first to the fourth quartiles of the variable. CHD: coronary heart disease.

**Table S2.** Factors associated with CHD in women in the baseline survey of the Beijing Health Management Cohort.

|                                     | OR    | 95% CI of OR |       | <i>p</i> |
|-------------------------------------|-------|--------------|-------|----------|
| <b>Age</b>                          | 1.071 | 1.065        | 1.076 | <0.001   |
| <b>BRI groups</b>                   |       |              |       |          |
| Q1                                  | Ref   | NA           | NA    | NA       |
| Q2                                  | 1.130 | 0.907        | 1.409 | 0.276    |
| Q3                                  | 1.246 | 1.007        | 1.542 | 0.043    |
| Q4                                  | 1.097 | 0.879        | 1.369 | 0.412    |
| <b>Alcohol drink (n, %)</b>         |       |              |       |          |
| Never                               | Ref   | NA           | NA    | NA       |
| Ever                                | 0.529 | 0.237        | 1.184 | 0.122    |
| <b>Night sleep duration</b>         |       |              |       |          |
| < 5 h                               | 1.409 | 1.115        | 1.780 | 0.004    |
| 5-7 h                               | 1.181 | 1.034        | 1.348 | 0.014    |
| > 7 h                               | Ref   | NA           | NA    | NA       |
| <b>Times of sleep late per week</b> |       |              |       |          |
| Often                               | 1.458 | 1.255        | 1.694 | <0.001   |
| Seldom                              | 1.259 | 1.095        | 1.448 | 0.001    |
| Never                               | Ref   | NA           | NA    | NA       |
| <b>Dietary preference</b>           |       |              |       |          |
| Salty food                          | 0.985 | 0.848        | 1.143 | 0.841    |
| Sweet food                          | 1.018 | 0.868        | 1.195 | 0.823    |
| Red meat                            | 1.214 | 1.033        | 1.425 | 0.018    |
| Pickled food                        | 1.001 | 0.729        | 1.373 | 0.997    |
| <b>Dietary pattern</b>              |       |              |       |          |
| No special                          | Ref   | NA           | NA    | NA       |
| Vegan                               | 0.532 | 0.211        | 1.342 | 0.181    |
| Meatarian                           | 1.103 | 0.830        | 1.466 | 0.500    |
| Prefer vegetarian food              | 0.976 | 0.809        | 1.177 | 0.800    |
| <b>Eating speed</b>                 |       |              |       |          |
| Very fast                           | 1.102 | 0.704        | 1.724 | 0.671    |
| A little bit fast                   | 1.289 | 1.128        | 1.472 | <0.001   |
| Normal speed                        | Ref   | NA           | NA    | NA       |
| Slow                                | 0.873 | 0.741        | 1.027 | 0.101    |
| <b>Psychological character</b>      |       |              |       |          |
| Positive and optimistic             | 0.451 | 0.353        | 0.577 | <0.001   |
| Emotional                           | 0.816 | 0.633        | 1.053 | 0.118    |
| Passive and depressed               | Ref   | NA           | NA    | NA       |
| Dispassionate                       | 0.651 | 0.509        | 0.833 | 0.001    |
| <b>Hypertension</b>                 | 1.814 | 1.606        | 2.049 | <0.001   |
| <b>Hyperuricemia</b>                | 1.198 | 1.053        | 1.363 | 0.006    |
| <b>TyG</b>                          |       |              |       |          |
| Q1                                  | Ref   | NA           | NA    | NA       |

|                         |       |       |       |        |
|-------------------------|-------|-------|-------|--------|
| Q2                      | 1.922 | 1.489 | 2.480 | <0.001 |
| Q3                      | 2.307 | 1.798 | 2.961 | <0.001 |
| Q4                      | 4.885 | 3.798 | 6.283 | <0.001 |
| <b>TyG-to-HDL Ratio</b> |       |       |       |        |
| Q1                      | Ref   | NA    | NA    | NA     |
| Q2                      | 1.090 | 0.916 | 1.298 | 0.330  |
| Q3                      | 1.122 | 0.946 | 1.332 | 0.186  |
| Q4                      | 1.527 | 1.293 | 1.803 | <0.001 |

---

BRI: body roundness index; TyG index: triglyceride-glucose index; OR: odds ratio; CI: confidence interval. Q1 to Q4 represented the first to the fourth quartiles of the variable. CHD: coronary heart disease.

**Table S3.** Factors associated with stroke in men in the baseline survey of the Beijing Health Management Cohort.

|                                     | OR    | 95% CI of OR |       | P      |
|-------------------------------------|-------|--------------|-------|--------|
| <b>Age</b>                          | 1.031 | 1.025        | 1.037 | <0.001 |
| <b>BRI groups</b>                   |       |              |       |        |
| Q1                                  | Ref   | NA           | NA    | NA     |
| Q2                                  | 0.992 | 0.795        | 1.237 | 0.942  |
| Q3                                  | 1.118 | 0.900        | 1.388 | 0.314  |
| Q4                                  | 1.094 | 0.877        | 1.365 | 0.424  |
| <b>Smoke status (n, %)</b>          |       |              |       |        |
| Never smoke                         | Ref   | NA           | NA    | NA     |
| Quit smoke                          | 1.245 | 1.008        | 1.537 | 0.042  |
| Current smoke                       | 0.740 | 0.633        | 0.866 | <0.001 |
| <b>Alcohol drink (n, %)</b>         |       |              |       |        |
| Never                               | Ref   | NA           | NA    | NA     |
| Ever                                | 1.083 | 0.895        | 1.310 | 0.414  |
| <b>Night sleep duration</b>         |       |              |       |        |
| < 5 h                               | 1.235 | 0.921        | 1.656 | 0.158  |
| 5-7 h                               | 1.156 | 0.993        | 1.346 | 0.062  |
| > 7 h                               | Ref   | NA           | NA    | NA     |
| <b>Times of sleep late per week</b> |       |              |       |        |
| Often                               | 1.296 | 1.085        | 1.547 | 0.004  |
| Seldom                              | 1.079 | 0.907        | 1.284 | 0.389  |
| Never                               | Ref   | NA           | NA    | NA     |
| <b>Dietary preference</b>           |       |              |       |        |
| Salty food                          | 0.919 | 0.790        | 1.069 | 0.274  |
| Sweet food                          | 1.186 | 0.985        | 1.428 | 0.072  |
| Red meat                            | 0.964 | 0.821        | 1.133 | 0.658  |
| Pickled food                        | 1.218 | 0.941        | 1.575 | 0.134  |
| <b>Dietary pattern</b>              |       |              |       |        |
| No special                          | Ref   | NA           | NA    | NA     |
| Vegan                               | 1.079 | 0.386        | 3.011 | 0.885  |
| Meatarian                           | 1.101 | 0.894        | 1.356 | 0.365  |
| Prefer vegetarian food              | 1.440 | 1.109        | 1.869 | 0.006  |
| <b>Eating speed</b>                 |       |              |       |        |
| Very fast                           | 1.346 | 1.046        | 1.733 | 0.021  |
| A little bit fast                   | 1.078 | 0.933        | 1.245 | 0.306  |
| Normal speed                        | Ref   | NA           | NA    | NA     |
| Slow                                | 0.592 | 0.446        | 0.786 | <0.001 |
| <b>Psychological character</b>      |       |              |       |        |
| Positive and optimistic             | 0.565 | 0.431        | 0.741 | <0.001 |
| Emotional                           | 0.952 | 0.704        | 1.288 | 0.751  |
| Passive and depressed               | Ref   | NA           | NA    | NA     |
| Dispassionate                       | 0.843 | 0.643        | 1.104 | 0.215  |

|                      |       |       |       |        |
|----------------------|-------|-------|-------|--------|
| <b>Hypertension</b>  | 1.956 | 1.704 | 2.245 | <0.001 |
| <b>Hyperuricemia</b> | 2.662 | 2.330 | 3.041 | <0.001 |
| <b>TyG</b>           |       |       |       |        |
| Q1                   | Ref   | NA    | NA    | NA     |
| Q2                   | 0.950 | 0.765 | 1.181 | 0.647  |
| Q3                   | 1.284 | 1.042 | 1.582 | 0.019  |
| Q4                   | 1.299 | 1.043 | 1.618 | 0.020  |

BRI: body roundness index; TyG index: triglyceride-glucose index; OR: odds ratio; CI: confidence interval. Q1 to Q4 represented the first to the fourth quartiles of the variable.

**Table S4.** Factors associated with stroke in women in the baseline survey of the Beijing Health Management Cohort.

|                                     | OR    | 95% CI of OR |       | <i>P</i> |
|-------------------------------------|-------|--------------|-------|----------|
| <b>Age</b>                          | 1.019 | 1.014        | 1.025 | <0.001   |
| <b>BRI groups</b>                   |       |              |       |          |
| Q1                                  | Ref   | NA           | NA    | NA       |
| Q2                                  | 1.079 | 0.904        | 1.288 | 0.398    |
| Q3                                  | 1.120 | 0.933        | 1.344 | 0.224    |
| Q4                                  | 1.182 | 0.968        | 1.442 | 0.101    |
| <b>Alcohol drink (n, %)</b>         |       |              |       |          |
| Never                               | Ref   | NA           | NA    | NA       |
| Ever                                |       |              |       | 0.090    |
| <b>Night sleep duration</b>         |       |              |       |          |
| < 5 h                               | 1.007 | 0.749        | 1.353 | 0.963    |
| 5-7 h                               | 1.127 | 0.987        | 1.287 | 0.076    |
| > 7 h                               | Ref   | NA           | NA    | NA       |
| <b>Times of sleep late per week</b> |       |              |       |          |
| Often                               | 0.950 | 0.810        | 1.113 | 0.522    |
| Seldom                              | 0.993 | 0.858        | 1.150 | 0.930    |
| Never                               | Ref   | NA           | NA    | NA       |
| <b>Dietary preference</b>           |       |              |       |          |
| Salty food                          | 0.999 | 0.857        | 1.164 | 0.986    |
| Sweet food                          | 1.139 | 0.976        | 1.329 | 0.099    |
| Red meat                            | 1.031 | 0.869        | 1.223 | 0.726    |
| Pickled food                        | 0.821 | 0.597        | 1.128 | 0.224    |
| <b>Dietary pattern</b>              |       |              |       |          |
| No special                          | Ref   | NA           | NA    | NA       |
| Vegan                               | 0.696 | 0.256        | 1.895 | 0.478    |
| Meatarian                           | 0.846 | 0.632        | 1.133 | 0.261    |
| Prefer vegetarian food              | 1.167 | 0.960        | 1.418 | 0.122    |
| <b>Eating speed</b>                 |       |              |       |          |
| Very fast                           | 0.849 | 0.518        | 1.392 | 0.517    |
| A little bit fast                   | 1.091 | 0.947        | 1.256 | 0.227    |
| Normal speed                        | Ref   | NA           | NA    | NA       |
| Slow                                | 1.029 | 0.873        | 1.214 | 0.733    |
| <b>Psychological character</b>      |       |              |       |          |
| Positive and optimistic             | 0.698 | 0.537        | 0.905 | 0.007    |
| Emotional                           | 1.133 | 0.865        | 1.485 | 0.364    |
| Passive and depressed               | Ref   | NA           | NA    | NA       |
| Dispassionate                       | 0.907 | 0.698        | 1.179 | 0.467    |
| <b>Hypertension</b>                 | 1.186 | 1.009        | 1.393 | 0.039    |
| <b>Hyperuricemia</b>                | 1.347 | 1.159        | 1.565 | <0.001   |
| <b>TyG</b>                          |       |              |       |          |
| Q1                                  | Ref   | NA           | NA    | NA       |

|    |       |       |       |       |
|----|-------|-------|-------|-------|
| Q2 | 1.129 | 0.950 | 1.343 | 0.169 |
| Q3 | 1.084 | 0.904 | 1.299 | 0.383 |
| Q4 | 1.122 | 0.917 | 1.374 | 0.264 |

---

BRI: body roundness index; TyG index: triglyceride-glucose index; OR: odds ratio; CI: confidence interval. Q1 to Q4 represented the first to the fourth quartiles of the variable.



**Table S5.** Age-stratified analysis of the association between BRI, TyG index and CVDs in different sexes.

| Age groups    | <40   |        | 40~59 |        |       | ≥ 60   |       |       |       |
|---------------|-------|--------|-------|--------|-------|--------|-------|-------|-------|
| Men           | OR    | 95% CI | OR    | 95% CI | OR    | 95% CI |       |       |       |
| <b>CVD</b>    |       |        |       |        |       |        |       |       |       |
| BRI groups    |       |        |       |        |       |        |       |       |       |
| Q1            | Ref   | NA     | NA    | Ref    | NA    | NA     | Ref   | NA    | NA    |
| Q2            | 0.825 | 0.632  | 1.076 | 1.152  | 0.941 | 1.411  | 0.763 | 0.541 | 1.075 |
| Q3            | 0.901 | 0.688  | 1.179 | 1.134  | 0.928 | 1.387  | 0.712 | 0.512 | 0.990 |
| Q4            | 0.874 | 0.663  | 1.150 | 1.113  | 0.905 | 1.369  | 0.708 | 0.511 | 0.982 |
| TyG index     |       |        |       |        |       |        |       |       |       |
| Q1            | Ref   | NA     | NA    | Ref    | NA    | NA     | Ref   | NA    | NA    |
| Q2            | 1.383 | 1.017  | 1.880 | 1.092  | 0.888 | 1.344  | 1.256 | 0.920 | 1.713 |
| Q3            | 2.091 | 1.543  | 2.833 | 1.465  | 1.201 | 1.786  | 1.725 | 1.262 | 2.359 |
| Q4            | 2.772 | 2.013  | 3.816 | 1.945  | 1.587 | 2.384  | 2.023 | 1.462 | 2.799 |
| <b>CHD</b>    |       |        |       |        |       |        |       |       |       |
| BRI groups    |       |        |       |        |       |        |       |       |       |
| Q1            | Ref   | NA     | NA    | Ref    | NA    | NA     | Ref   | NA    | NA    |
| Q2            | 0.885 | 0.619  | 1.265 | 1.118  | 0.891 | 1.402  | 0.645 | 0.449 | 0.929 |
| Q3            | 0.805 | 0.556  | 1.166 | 1.076  | 0.859 | 1.348  | 0.603 | 0.425 | 0.855 |
| Q4            | 0.774 | 0.533  | 1.123 | 1.007  | 0.799 | 1.270  | 0.616 | 0.437 | 0.869 |
| TyG index     |       |        |       |        |       |        |       |       |       |
| Q1            | Ref   | NA     | NA    | Ref    | NA    | NA     | Ref   | NA    | NA    |
| Q2            | 1.717 | 1.088  | 2.71  | 1.238  | 0.969 | 1.582  | 1.729 | 1.213 | 2.466 |
| Q3            | 2.549 | 1.624  | 4.003 | 1.750  | 1.385 | 2.211  | 2.247 | 1.567 | 3.222 |
| Q4            | 4.597 | 2.902  | 7.282 | 2.683  | 2.117 | 3.401  | 2.773 | 1.913 | 4.020 |
| <b>Stroke</b> |       |        |       |        |       |        |       |       |       |
| BRI groups    |       |        |       |        |       |        |       |       |       |
| Q1            | Ref   | NA     | NA    | Ref    | NA    | NA     | Ref   | NA    | NA    |
| Q2            | 0.819 | 0.571  | 1.174 | 1.18   | 0.849 | 1.641  | 0.769 | 0.422 | 1.402 |
| Q3            | 1.138 | 0.804  | 1.612 | 1.186  | 0.855 | 1.644  | 0.924 | 0.532 | 1.605 |
| Q4            | 1.066 | 0.744  | 1.529 | 1.282  | 0.918 | 1.789  | 0.797 | 0.458 | 1.389 |
| TyG index     |       |        |       |        |       |        |       |       |       |
| Q1            | Ref   | NA     | NA    | Ref    | NA    | NA     | Ref   | NA    | NA    |
| Q2            | 1.183 | 0.803  | 1.743 | 0.923  | 0.678 | 1.257  | 0.598 | 0.355 | 1.006 |
| Q3            | 1.725 | 1.179  | 2.526 | 1.005  | 0.745 | 1.356  | 1.318 | 0.826 | 2.103 |
| Q4            | 1.961 | 1.306  | 2.943 | 0.99   | 0.725 | 1.352  | 1.084 | 0.655 | 1.793 |

**Women****CVD**

## BRI groups

|    |       |       |       |       |       |       |       |       |       |
|----|-------|-------|-------|-------|-------|-------|-------|-------|-------|
| Q1 | Ref   | NA    | NA    | Ref   | NA    | NA    | Ref   | NA    | NA    |
| Q2 | 1.147 | 0.927 | 1.419 | 1.032 | 0.828 | 1.286 | 0.858 | 0.540 | 1.363 |
| Q3 | 1.201 | 0.950 | 1.518 | 1.073 | 0.864 | 1.333 | 0.997 | 0.654 | 1.521 |
| Q4 | 1.439 | 1.106 | 1.871 | 1.188 | 0.947 | 1.491 | 0.841 | 0.552 | 1.282 |

## TyG index

|               |        |       |        |       |       |       |       |       |       |
|---------------|--------|-------|--------|-------|-------|-------|-------|-------|-------|
| Q1            | Ref    | NA    | NA     | Ref   | NA    | NA    | Ref   | NA    | NA    |
| Q2            | 1.297  | 1.050 | 1.604  | 1.392 | 1.11  | 1.746 | 1.230 | 0.723 | 2.093 |
| Q3            | 1.227  | 0.969 | 1.555  | 1.633 | 1.307 | 2.039 | 1.311 | 0.796 | 2.161 |
| Q4            | 1.970  | 1.504 | 2.579  | 2.479 | 1.971 | 3.118 | 2.137 | 1.291 | 3.536 |
| <b>CHD</b>    |        |       |        |       |       |       |       |       |       |
| BRI groups    |        |       |        |       |       |       |       |       |       |
| Q1            | Ref    | NA    | NA     | Ref   | NA    | NA    | Ref   | NA    | NA    |
| Q2            | 0.912  | 0.571 | 1.456  | 1.066 | 0.786 | 1.446 | 1.048 | 0.64  | 1.716 |
| Q3            | 0.804  | 0.483 | 1.339  | 1.184 | 0.882 | 1.59  | 1.078 | 0.684 | 1.699 |
| Q4            | 0.960  | 0.565 | 1.633  | 1.213 | 0.894 | 1.645 | 0.932 | 0.592 | 1.467 |
| TyG index     |        |       |        |       |       |       |       |       |       |
| Q1            | Ref    | NA    | NA     | Ref   | NA    | NA    | Ref   | NA    | NA    |
| Q2            | 2.427  | 1.387 | 4.248  | 1.886 | 1.332 | 2.671 | 1.074 | 0.622 | 1.854 |
| Q3            | 2.580  | 1.414 | 4.708  | 2.474 | 1.765 | 3.468 | 1.073 | 0.643 | 1.79  |
| Q4            | 10.901 | 6.035 | 19.692 | 5.292 | 3.771 | 7.426 | 1.884 | 1.126 | 3.154 |
| <b>Stroke</b> |        |       |        |       |       |       |       |       |       |
| BRI groups    |        |       |        |       |       |       |       |       |       |
| Q1            | Ref    | NA    | NA     | Ref   | NA    | NA    | Ref   | NA    | NA    |
| Q2            | 1.198  | 0.947 | 1.514  | 0.974 | 0.731 | 1.299 | 0.437 | 0.185 | 1.035 |
| Q3            | 1.271  | 0.981 | 1.647  | 0.97  | 0.728 | 1.293 | 0.684 | 0.334 | 1.399 |
| Q4            | 1.622  | 1.211 | 2.173  | 0.992 | 0.728 | 1.352 | 0.688 | 0.339 | 1.398 |
| TyG index     |        |       |        |       |       |       |       |       |       |
| Q1            | Ref    | NA    | NA     | Ref   | NA    | NA    | Ref   | NA    | NA    |
| Q2            | 1.178  | 0.938 | 1.481  | 1.106 | 0.835 | 1.466 | 1.206 | 0.458 | 3.173 |
| Q3            | 1.109  | 0.859 | 1.431  | 1.167 | 0.883 | 1.544 | 1.052 | 0.422 | 2.627 |
| Q4            | 1.228  | 0.897 | 1.681  | 1.062 | 0.783 | 1.441 | 1.514 | 0.604 | 3.791 |

BRI: body roundness index; TyG index: triglyceride-glucose index; CVD: cardiovascular disease; CHD: coronary heart disease; OR: odds ratio; CI: confidence interval. Q1 to Q4 represented the first to the fourth quartiles of the variable.

**Table S6.** Basic characteristics of the study population without taking medication on treating diabetes and dyslipidemia.

| <b>Characteristics</b>              | <b>Men (n=32407)</b> |       | <b>Women (n=35502)</b> |       | <b>Overall (n=67909)</b> |       | <b>p</b> |
|-------------------------------------|----------------------|-------|------------------------|-------|--------------------------|-------|----------|
| <b>Age (n, %)</b>                   | 42.20                | 12.62 | 40.78                  | 12.12 | 41.46                    | 12.38 | <0.001   |
| 18-                                 | 4693                 | 14.48 | 5952                   | 16.77 | 10645                    | 15.68 | <0.001   |
| 30-                                 | 11266                | 34.76 | 13335                  | 37.56 | 24601                    | 36.23 |          |
| 40-                                 | 7965                 | 24.58 | 8523                   | 24.01 | 16488                    | 24.28 |          |
| 50-                                 | 5434                 | 16.77 | 4689                   | 13.21 | 10123                    | 14.91 |          |
| 60-                                 | 1991                 | 6.14  | 2078                   | 5.85  | 4069                     | 5.99  |          |
| ≥70                                 | 1058                 | 3.26  | 925                    | 2.61  | 1983                     | 2.92  |          |
| <b>BMI (mean (SD))</b>              | 26                   | 3.68  | 23.03                  | 3.51  | 24.46                    | 3.89  |          |
| <b>WC (mean (SD))</b>               | 88.88                | 11.07 | 75.05                  | 9.79  | 81.72                    | 12.51 |          |
| <b>BRI (mean (SD))</b>              | 3.7                  | 1.3   | 2.83                   | 1.07  | 3.25                     | 1.26  |          |
| <b>Smoke status (n, %)</b>          |                      |       |                        |       |                          |       |          |
| Never smoke                         | 17164                | 52.96 | 29960                  | 84.39 | 47124                    | 69.39 |          |
| Quit smoke                          | 1819                 | 5.61  | 128                    | 0.36  | 1947                     | 2.87  |          |
| Current smoke                       | 8611                 | 26.57 | 443                    | 1.25  | 9054                     | 13.33 |          |
| <b>Alcohol drink (n, %)</b>         |                      |       |                        |       |                          |       |          |
| Never                               | 24285                | 74.94 | 30328                  | 85.43 | 54613                    | 80.42 |          |
| Ever                                | 3309                 | 10.21 | 203                    | 0.57  | 3512                     | 5.17  |          |
| <b>Night sleep duration (n, %)</b>  |                      |       |                        |       |                          |       |          |
| < 5 h                               | 1233                 | 3.80  | 1210                   | 3.41  | 2443                     | 3.60  |          |
| 5-7 h                               | 17098                | 52.76 | 18621                  | 52.45 | 35719                    | 52.6  |          |
| > 7 h                               | 9263                 | 28.58 | 10700                  | 30.14 | 19963                    | 29.40 |          |
| <b>Times of sleep late per week</b> |                      |       |                        |       |                          |       |          |
| Often                               | 10049                | 31.01 | 10466                  | 29.48 | 20515                    | 30.21 |          |
| Seldom                              | 9075                 | 28.00 | 10761                  | 30.31 | 19836                    | 29.21 |          |
| Never                               | 8470                 | 26.14 | 9304                   | 26.21 | 17774                    | 26.17 |          |
| <b>Dietary preference</b>           |                      |       |                        |       |                          |       |          |
| Salty food                          | 7671                 | 23.67 | 5935                   | 16.72 | 13606                    | 20.04 |          |
| Sweet food                          | 3954                 | 12.20 | 5448                   | 15.35 | 9402                     | 13.84 |          |
| Red meat                            | 6860                 | 21.17 | 4543                   | 12.80 | 11403                    | 16.79 |          |
| Pickled food                        | 1891                 | 5.84  | 1492                   | 4.20  | 3383                     | 4.98  |          |
| <b>Dietary pattern</b>              |                      |       |                        |       |                          |       |          |
| No special                          | 23082                | 71.23 | 26188                  | 73.76 | 49270                    | 72.55 |          |
| Vegan                               | 106                  | 0.33  | 139                    | 0.39  | 245                      | 0.36  |          |
| Meatarian                           | 3129                 | 9.66  | 1774                   | 5.00  | 4903                     | 7.22  |          |
| Prefer vegetarian food              | 1277                 | 3.94  | 2430                   | 6.84  | 3707                     | 5.46  |          |
| <b>Eating speed (n, %)</b>          |                      |       |                        |       |                          |       |          |
| Very fast                           | 1672                 | 5.16  | 552                    | 1.55  | 2224                     | 3.27  |          |
| A little bit fast                   | 9509                 | 29.34 | 7052                   | 19.86 | 16561                    | 24.39 |          |
| Normal speed                        | 13682                | 42.22 | 17998                  | 50.70 | 31680                    | 46.65 |          |
| Slow                                | 2731                 | 8.43  | 4929                   | 13.88 | 7660                     | 11.28 |          |

**Psychological character****(n, %)**

|                             |        |       |       |       |        |       |
|-----------------------------|--------|-------|-------|-------|--------|-------|
| Positive and optimistic     | 14582  | 45.00 | 14396 | 40.55 | 28978  | 42.67 |
| Emotional                   | 2746   | 8.47  | 5086  | 14.33 | 7832   | 11.53 |
| Passive and depressed       | 1535   | 4.74  | 1767  | 4.98  | 3302   | 4.86  |
| Dispassionate               | 8731   | 26.94 | 9282  | 26.15 | 18013  | 26.53 |
| <b>SBP</b> (mean (SD))      | 127.52 | 15.45 | 116.5 | 16.03 | 121.81 | 16.69 |
| <b>DBP</b> (mean (SD))      | 77.47  | 11.19 | 69.45 | 10.09 | 73.31  | 11.36 |
| <b>TC</b> (median (IQR))    | 4.91   | 1.20  | 4.82  | 1.21  | 4.86   | 1.20  |
| <b>TG</b> (median (IQR))    | 1.31   | 1.02  | 0.86  | 0.6   | 1.04   | 0.86  |
| <b>LDL</b> (median (IQR))   | 2.92   | 0.97  | 2.69  | 0.97  | 2.80   | 1.00  |
| <b>HDL</b> (median (IQR))   | 1.14   | 0.32  | 1.45  | 0.42  | 1.29   | 0.44  |
| <b>FPG</b> (median (IQR))   | 5.11   | 0.64  | 4.88  | 0.53  | 4.98   | 0.60  |
| <b>SUA</b> (median (IQR))   | 397    | 111   | 281   | 83    | 332    | 133   |
| <b>Hypertension</b> (n, %)  | 8690   | 26.82 | 4152  | 11.70 | 12842  | 18.91 |
| <b>Hyperuricemia</b> (n, %) | 12739  | 39.31 | 4610  | 12.99 | 17349  | 25.55 |
| <b>CHD</b> (n, %)           | 1175   | 3.63  | 1089  | 3.07  | 2264   | 3.33  |
| <b>Stroke</b> (n, %)        | 872    | 2.69  | 1252  | 3.53  | 2124   | 3.13  |
| <b>CVD</b> (n, %)           | 1809   | 5.58  | 2216  | 6.24  | 4025   | 5.93  |

---

BMI: body mass index, kg/m<sup>2</sup>; WC: waist circumference; BRI: body roundness index; SBP: systolic blood pressure, mmHg; DBP: diastolic blood pressure, mmHg; TC: total cholesterol, mmol/L; TG: triglycerides, mmol/L; HDL: high-density lipoprotein, mmol/L; LDL: low-density lipoprotein, mmol/L; FPG: fasting plasma glucose; SUA: serum uric acid; CHD: coronary heart disease; CVD: cardiovascular disease.

**Table S7.** Factors associated with CVD in men without taking medication on treating diabetes and dyslipidemia.

|                                     | OR    | 95% CI of OR |       | <i>p</i> |
|-------------------------------------|-------|--------------|-------|----------|
| <b>Age</b>                          | 1.038 | 1.033        | 1.043 | <0.001   |
| <b>BRI groups</b>                   |       |              |       |          |
| Q1                                  | Ref   | NA           | NA    | NA       |
| Q2                                  | 0.952 | 0.805        | 1.126 | 0.564    |
| Q3                                  | 0.935 | 0.790        | 1.107 | 0.439    |
| Q4                                  | 0.852 | 0.716        | 1.014 | 0.071    |
| <b>Smoke status (n, %)</b>          |       |              |       |          |
| Never smoke                         | Ref   | NA           | NA    | NA       |
| Quit smoke                          | 1.318 | 1.094        | 1.587 | 0.004    |
| Current smoke                       | 0.789 | 0.694        | 0.898 | <0.001   |
| <b>Alcohol drink (n, %)</b>         |       |              |       |          |
| Never                               | Ref   | NA           | NA    | NA       |
| Ever                                | 1.024 | 0.870        | 1.205 | 0.776    |
| <b>Night sleep duration</b>         |       |              |       |          |
| < 5 h                               | 1.307 | 1.024        | 1.668 | 0.032    |
| 5-7 h                               | 1.147 | 1.010        | 1.301 | 0.034    |
| > 7 h                               | Ref   | NA           | NA    | NA       |
| <b>Times of sleep late per week</b> |       |              |       |          |
| Often                               | 1.345 | 1.160        | 1.559 | <0.001   |
| Seldom                              | 1.038 | 0.896        | 1.202 | 0.618    |
| Never                               | Ref   | NA           | NA    | NA       |
| <b>Dietary preference</b>           |       |              |       |          |
| Salty food                          | 1.028 | 0.908        | 1.164 | 0.660    |
| Sweet food                          | 1.140 | 0.977        | 1.330 | 0.095    |
| Red meat                            | 1.132 | 0.993        | 1.291 | 0.064    |
| Pickled food                        | 1.068 | 0.862        | 1.323 | 0.546    |
| <b>Dietary pattern</b>              |       |              |       |          |
| No special                          | Ref   | NA           | NA    | NA       |
| Vegan                               | 1.483 | 0.673        | 3.267 | 0.328    |
| Meatarian                           | 1.043 | 0.878        | 1.239 | 0.630    |
| Prefer vegetarian food              | 1.284 | 1.013        | 1.626 | 0.038    |
| <b>Eating speed</b>                 |       |              |       |          |
| Very fast                           | 1.556 | 1.265        | 1.914 | <0.001   |
| A little bit fast                   | 1.260 | 1.117        | 1.420 | <0.001   |
| Normal speed                        | Ref   | NA           | NA    | NA       |
| Slow                                | 0.677 | 0.538        | 0.852 | <0.001   |
| <b>Psychological character</b>      |       |              |       |          |
| Positive and optimistic             | 0.522 | 0.418        | 0.651 | <0.001   |
| Emotional                           | 1.026 | 0.803        | 1.310 | 0.840    |
| Passive and depressed               | Ref   | NA           | NA    | NA       |
| Dispassionate                       | 0.795 | 0.637        | 0.992 | 0.043    |

|                      |       |       |       |        |
|----------------------|-------|-------|-------|--------|
| <b>Hypertension</b>  | 1.850 | 1.657 | 2.065 | <0.001 |
| <b>Hyperuricemia</b> | 1.643 | 1.479 | 1.826 | <0.001 |
| <b>TyG</b>           |       |       |       |        |
| Q1                   | Ref   | NA    | NA    | NA     |
| Q2                   | 1.172 | 0.977 | 1.406 | 0.087  |
| Q3                   | 1.784 | 1.498 | 2.125 | <0.001 |
| Q4                   | 2.331 | 1.943 | 2.797 | <0.001 |

BRI: body roundness index; TyG: triglyceride-glucose index; OR: odds ratio; CI: confidence interval. Q1 to Q4 represented the first to the fourth quantiles of the variable. CVD: cardiovascular disease.

**Table S8.** factors associated with CVD in women without taking medication on treating diabetes and dyslipidemia.

|                                     | OR    | 95% CI of OR |       | <i>p</i> |
|-------------------------------------|-------|--------------|-------|----------|
| <b>Age</b>                          | 1.039 | 1.035        | 1.044 | <0.001   |
| <b>BRI groups</b>                   |       |              |       |          |
| Q1                                  | Ref   | NA           | NA    | NA       |
| Q2                                  | 1.080 | 0.927        | 1.259 | 0.324    |
| Q3                                  | 1.126 | 0.964        | 1.316 | 0.134    |
| Q4                                  | 1.139 | 0.963        | 1.347 | 0.129    |
| <b>Alcohol drink</b>                |       |              |       |          |
| Never                               | Ref   | NA           | NA    | NA       |
| Ever                                | 0.281 | 0.103        | 0.765 | 0.013    |
| <b>Night sleep duration</b>         |       |              |       |          |
| < 5 h                               | 1.139 | 0.902        | 1.439 | 0.275    |
| 5-7 h                               | 1.062 | 0.949        | 1.190 | 0.293    |
| > 7 h                               | Ref   | NA           | NA    | NA       |
| <b>Times of sleep late per week</b> |       |              |       |          |
| Often                               | 1.203 | 1.051        | 1.377 | 0.007    |
| Seldom                              | 1.186 | 1.046        | 1.345 | 0.008    |
| Never                               | Ref   | NA           | NA    | NA       |
| <b>Dietary preference</b>           |       |              |       |          |
| Salty food                          | 1.034 | 0.909        | 1.175 | 0.614    |
| Sweet food                          | 1.157 | 1.015        | 1.318 | 0.029    |
| Red meat                            | 1.197 | 1.042        | 1.375 | 0.011    |
| Pickled food                        | 0.857 | 0.662        | 1.110 | 0.243    |
| <b>Dietary pattern</b>              |       |              |       |          |
| No special                          | Ref   | NA           | NA    | NA       |
| Vegan                               | 0.530 | 0.214        | 1.312 | 0.170    |
| Meatarian                           | 1.004 | 0.799        | 1.262 | 0.971    |
| Prefer vegetarian food              | 1.180 | 1.000        | 1.393 | 0.050    |
| <b>Eating speed</b>                 |       |              |       |          |
| Very fast                           | 0.918 | 0.619        | 1.363 | 0.673    |
| A little bit fast                   | 1.162 | 1.032        | 1.308 | 0.013    |
| Normal speed                        | Ref   | NA           | NA    | NA       |
| Slow                                | 0.947 | 0.819        | 1.095 | 0.461    |
| <b>Psychological character</b>      |       |              |       |          |
| Positive and optimistic             | 0.537 | 0.438        | 0.659 | <0.001   |
| Emotional                           | 0.903 | 0.730        | 1.118 | 0.351    |
| Passive and depressed               | Ref   | NA           | NA    | NA       |
| Dispassionate                       | 0.707 | 0.575        | 0.869 | 0.001    |
| <b>Hypertension</b>                 | 1.283 | 1.130        | 1.456 | <0.001   |
| <b>Hyperuricemia</b>                | 1.240 | 1.096        | 1.403 | <0.001   |
| <b>TyG</b>                          |       |              |       |          |
| Q1                                  | Ref   | NA           | NA    | NA       |

|    |       |       |       |        |
|----|-------|-------|-------|--------|
| Q2 | 1.261 | 1.079 | 1.474 | 0.004  |
| Q3 | 1.343 | 1.146 | 1.573 | <0.001 |
| Q4 | 1.950 | 1.646 | 2.311 | <0.001 |

---

BRI: body roundness index; TyG: triglyceride-glucose index; OR: odds ratio; CI: confidence interval. Q1 to Q4 represented the first to the fourth quantiles of the variable. CVD: cardiovascular disease.
